# Supplementary material
Source: PubMed Central journal article supplement (PMC3515760)
Supplement: cr2012161x1.pdf [file cr2012161x1.pdf]

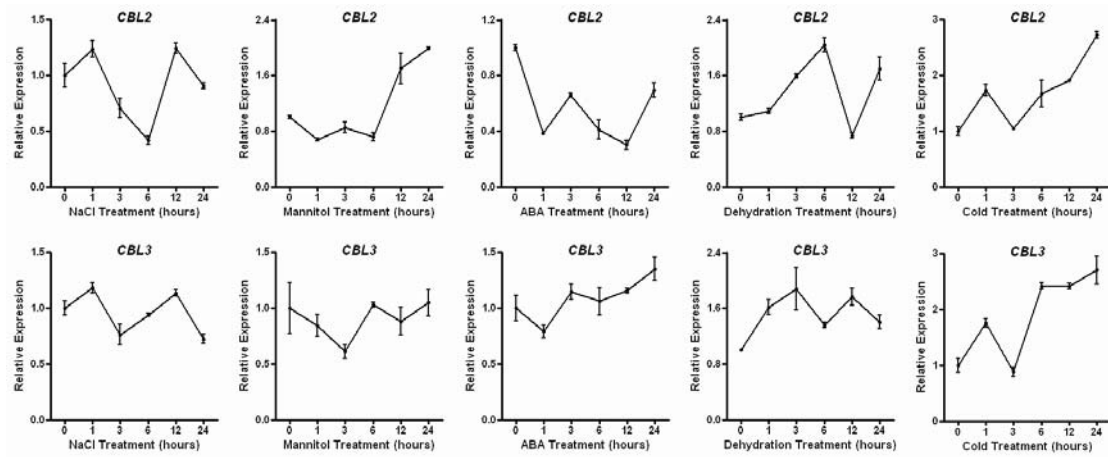

**Supplementary information, Figure S1** Expression of *CBL2* and *CBL3* in response to various abiotic stresses.

Ten-day old *Arabidopsis* seedlings were treated with 200 mM NaCl, 300 mM mannitol, 100  $\mu$ M ABA or stored at 4°C for 0, 1, 3, 6, 12 or 24 hours. For dehydration treatment, seedlings were transferred from MS agar medium to a filter paper in the petri dish and kept for 0, 1, 3, 6, 12 or 24 hours. qRT-PCR analysis of *CBL2* and *CBL3* expression was conducted after treatments. The *ACTIN2* gene was used as an internal control and the transcript level in untreated seedlings was set as 1.0. Error bars represent SD ( $n = 3$ ).
