# Supplementary material
Source: PubMed Central journal article supplement (PMC3515760)
Supplement: cr2012161x2.pdf [file cr2012161x2.pdf]

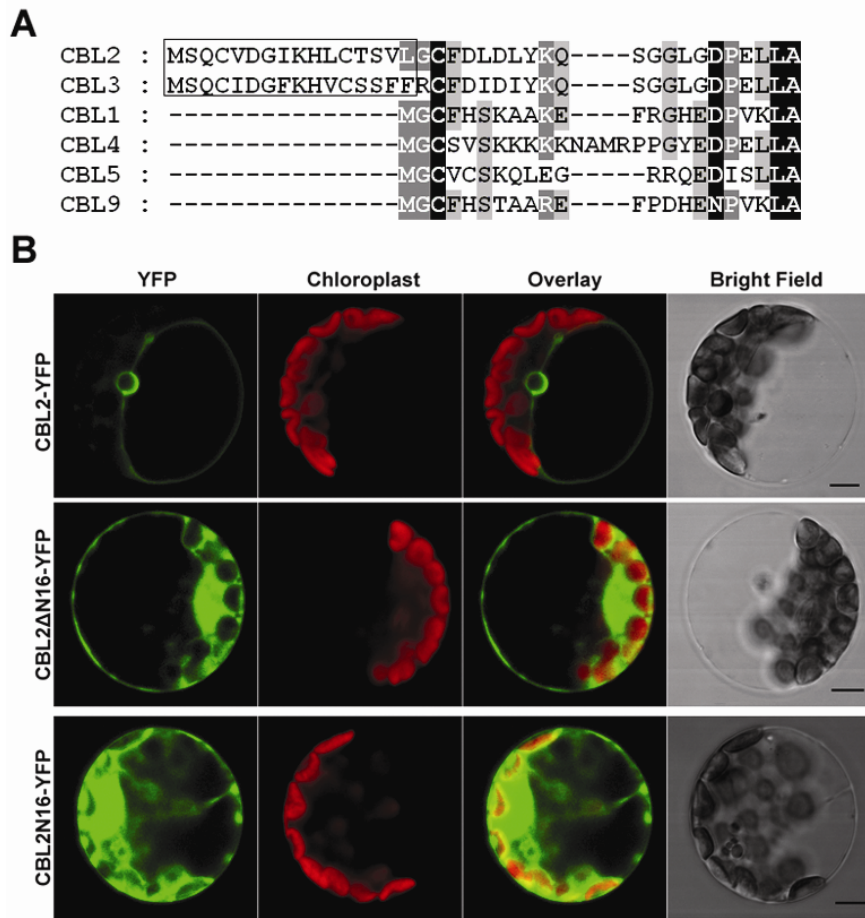

**Supplementary information, Figure S2** The N-terminal 16-aa of CBL2 is required but not sufficient for its tonoplast targeting.

(A) The N-terminal regions of CBL2, CBL3, CBL1, CBL4, CBL5 and CBL9 from *Arabidopsis thaliana* were aligned using the Clustal-W program. Amino acids that feature the N-terminal extension of CBL2/3 are framed. (B) The coding sequence of CBL2, CBL2 without N-terminal 16-aa and N-terminal 16-aa alone were in-frame cloned into the pA7-YFP vector, and transiently expressed in *Arabidopsis* mesophyll protoplasts to give rise to CBL2-YFP, CBL2ΔN16-YFP and CBL2N16-YFP, respectively. In each panel, the YFP signals (green), chloroplast fluorescence (red), overlay and bright field images from the same cell are shown. Scale bar = 5 μm.
