# Supplementary material
Source: PubMed Central journal article supplement (PMC3515760)
Supplement: cr2012161x3.pdf [file cr2012161x3.pdf]

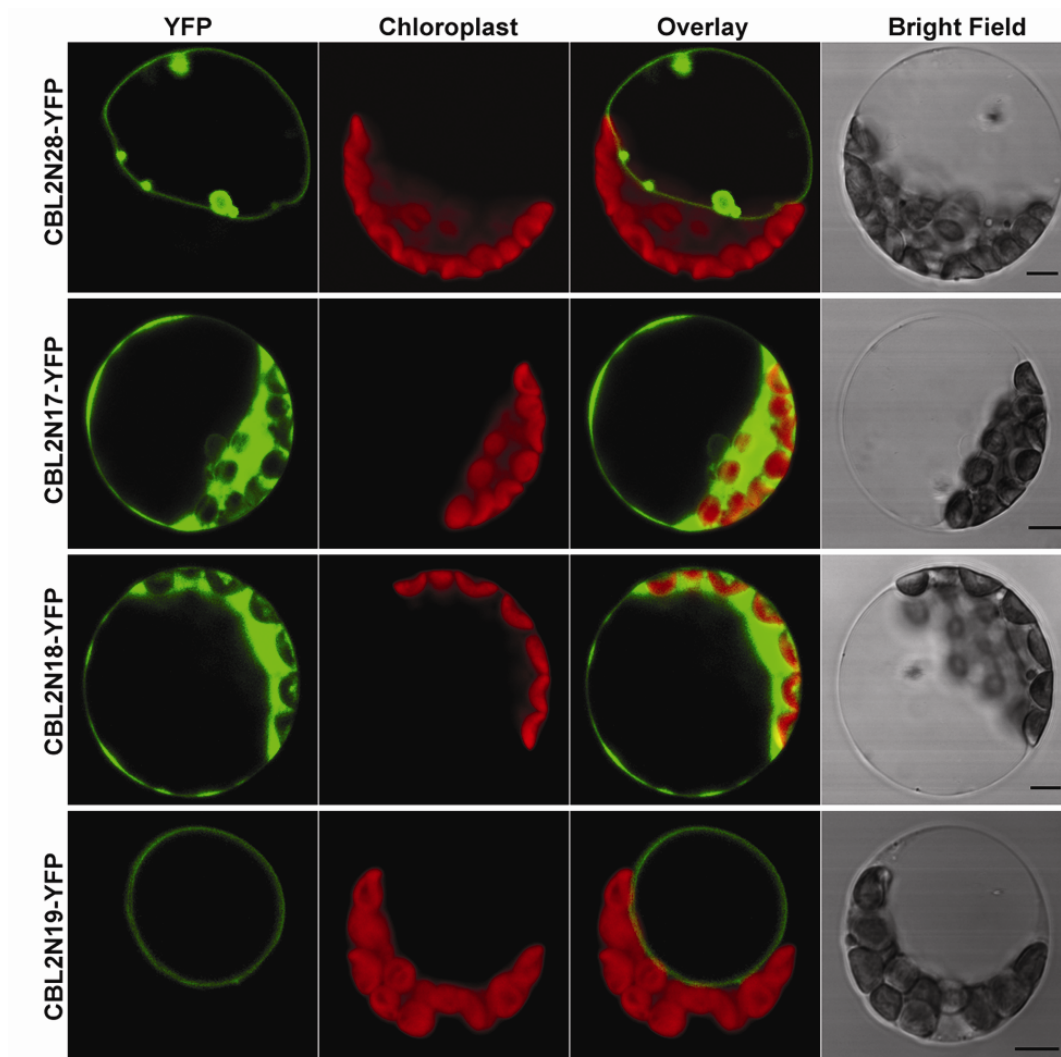

**Supplementary information, Figure S3** The first 19-aa in the N-terminus of CBL2 determines the tonoplast localization.

Protoplasts were transformed with YFP in fusion with N-terminal 28-aa (CBL2N28-YFP), 17-aa (CBL2N17-YFP), 18-aa (CBL2N18-YFP), 19-aa (CBL2N19-YFP) of CBL2. The YFP signals (green), chloroplast fluorescence (red), overlay and bright field images from the same cell are shown. Scale bar = 5  $\mu$ m.
