# Supplementary material
Source: PubMed Central journal article supplement (PMC3515760)
Supplement: cr2012161x4.pdf [file cr2012161x4.pdf]

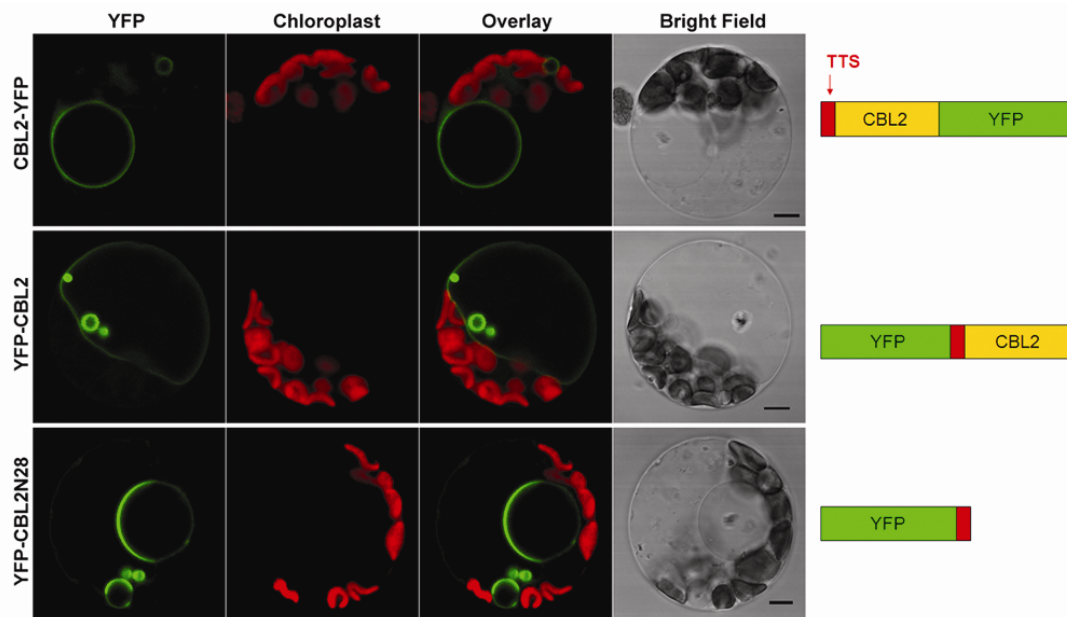

**Supplementary information, Figure S4** The efficacy of CBL2 Tonoplast Targeting Sequence (TTS) is independent of its N-terminal location.

The coding sequence of CBL2 was in-frame fused to the upstream or downstream of YFP so that TTS is located in the N-terminus (the top panel) or middle (the middle panel) of the fusion protein. TTS was also constructed at the C-terminus as the YFP-TTS fusion (the bottom panel). Typical tonoplast localization patterns were observed for all these three constructs when expressed in *Arabidopsis* protoplast. Scale bar = 5  $\mu\text{m}$ .
