# Supplementary material
Source: PubMed Central journal article supplement (PMC3515760)
Supplement: cr2012161x6.pdf [file cr2012161x6.pdf]

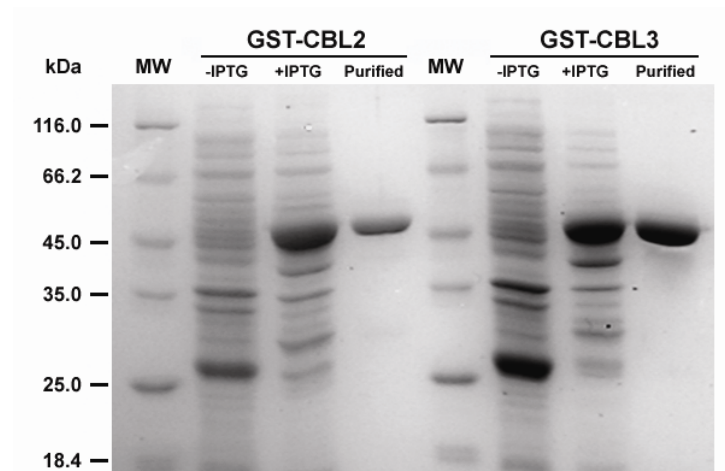

**Supplementary information, Figure S6** Purification of recombinant CBL2 and CBL3 proteins from *E-Coli* cells.

IPTG-induced heterologous expression of GST-fusion proteins before and after purification is shown in the SDS-PAGE stained with Coomassie Brilliant Blue R 250.
