# Supplementary material
Source: PubMed Central journal article supplement (PMC3515760)
Supplement: cr2012161x7.pdf [file cr2012161x7.pdf]

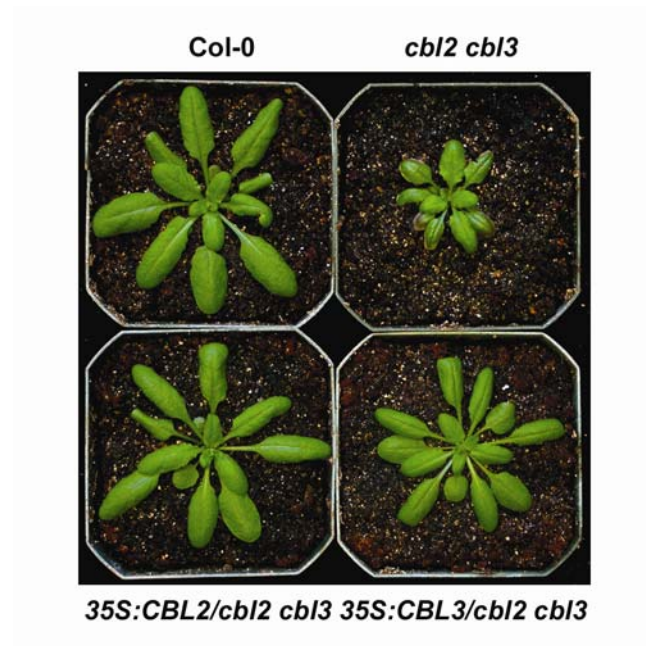

**Supplementary information, Figure S7** Complementation of the *cbl2 cbl3* double mutant by *CBL2* or *CBL3*.

The *cbl2 cbl3* growth phenotype was rescued by either 35S:*CBL2* or 35S:*CBL3* transgene. Representative image of 4-week old T<sub>1</sub> transformants is shown.
