# Supplementary material
Source: PubMed Central journal article supplement (PMC3515760)
Supplement: cr2012161x8.pdf [file cr2012161x8.pdf]

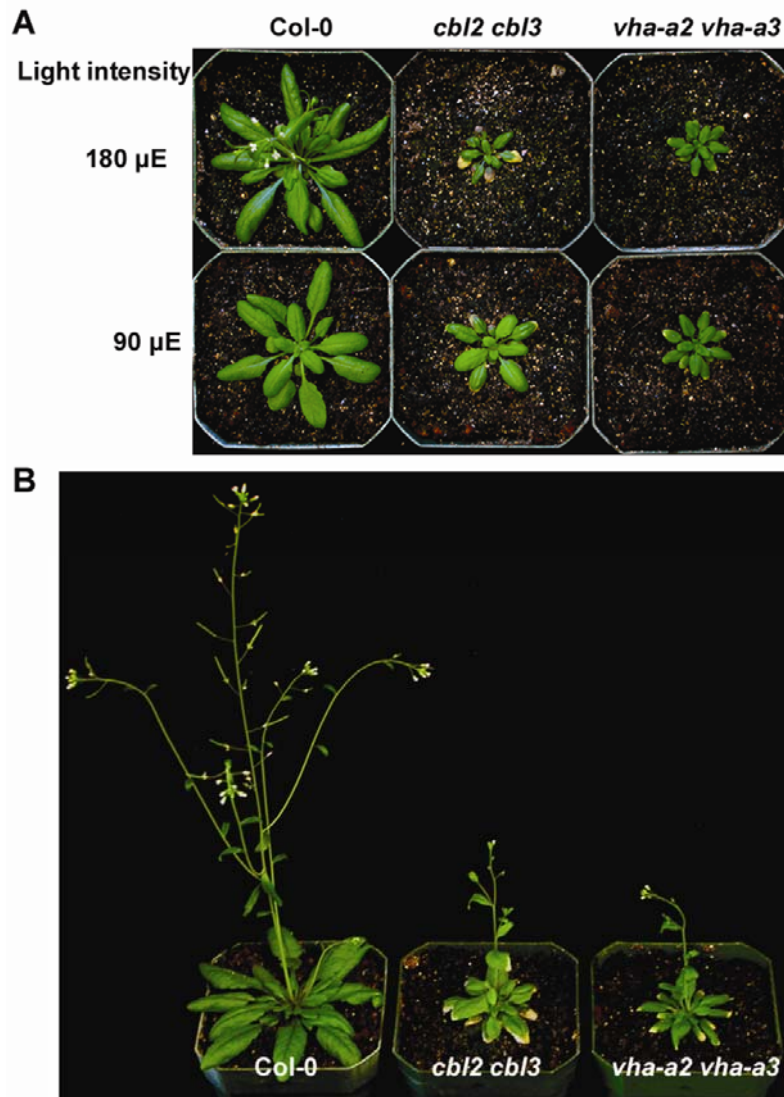

**Supplementary information, Figure S8** Phenotype of *cbl2 cbl3* and *vha-a2 vha-a3* plants grown in the soil.

(A) Wild-type, *cbl2 cbl3* and *vha-a2 vha-a3* plants were grown in indicated light conditions under 12-h light/12-h dark cycles. Pictures were taken for 4-week old plants grown in the soil. (B) 6-week old *Arabidopsis* plants of wild-type, *cbl2 cbl3* and *vha-a2 vha-a3* plants in the soil. Both the *cbl2 cbl3* and *vha-a2 vha-a3* double mutants are delayed in growth and bolting.
