# Supplementary material
Source: PubMed Central journal article supplement (PMC3515760)
Supplement: cr2012161x10.pdf [file cr2012161x10.pdf]

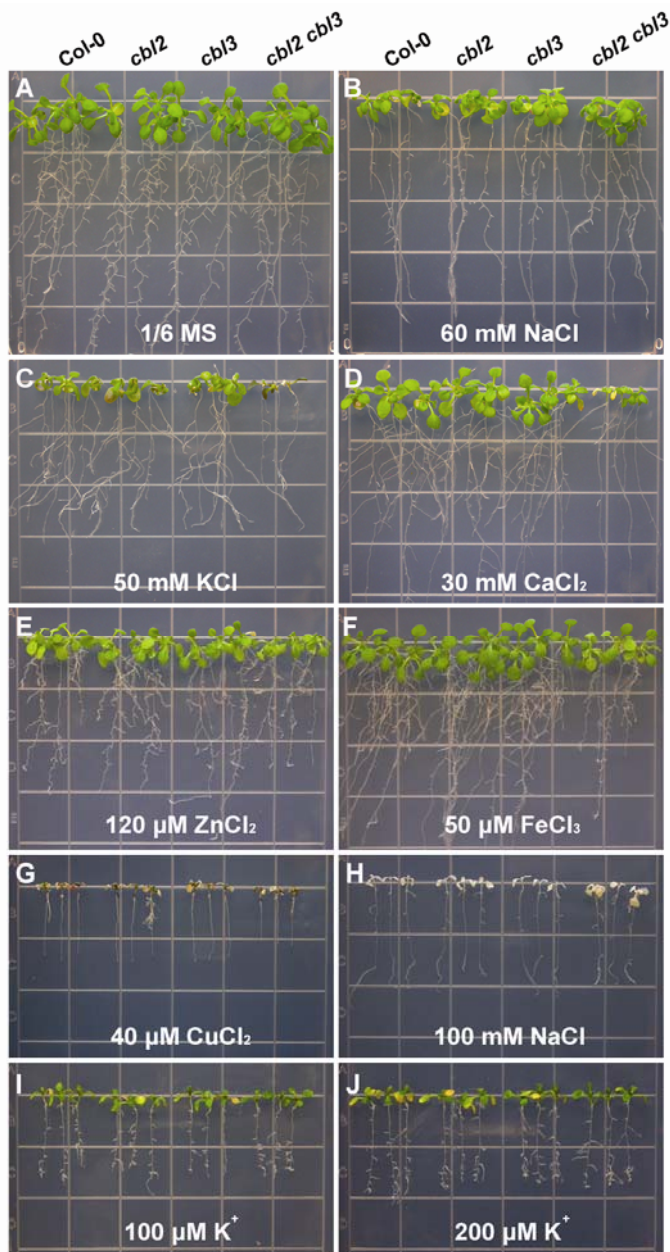

**Supplementary information, Figure S10** Growth phenotype of *cbl2*, *cbl3* single mutants and *cbl2 cbl3* double mutant under various ionic stress conditions.

*Col-0*, *cbl2*, *cbl3* and *cbl2 cbl3* seeds were germinated on MS agar medium and 5-day old seedlings were transferred onto 1/6 MS medium (A) or 1/6 MS medium supplemented with 60 mM NaCl (B), 50 mM KCl (C), 30 mM CaCl<sub>2</sub> (D), 120 μM ZnCl<sub>2</sub> (E), 50 μM FeCl<sub>3</sub> (F), 40 μM CuCl<sub>2</sub> (G), 100 mM NaCl (H), respectively. Photographs were taken on the 14th day after transfer. Low K<sup>+</sup>-tolerance assay were performed on modified MS medium with 100 μM K<sup>+</sup> (I) or 200 μM K<sup>+</sup> (J). Photographs were taken on the 10th day after transfer.
