# Supplementary material
Source: PubMed Central journal article supplement (PMC3515760)
Supplement: cr2012161x11.pdf [file cr2012161x11.pdf]

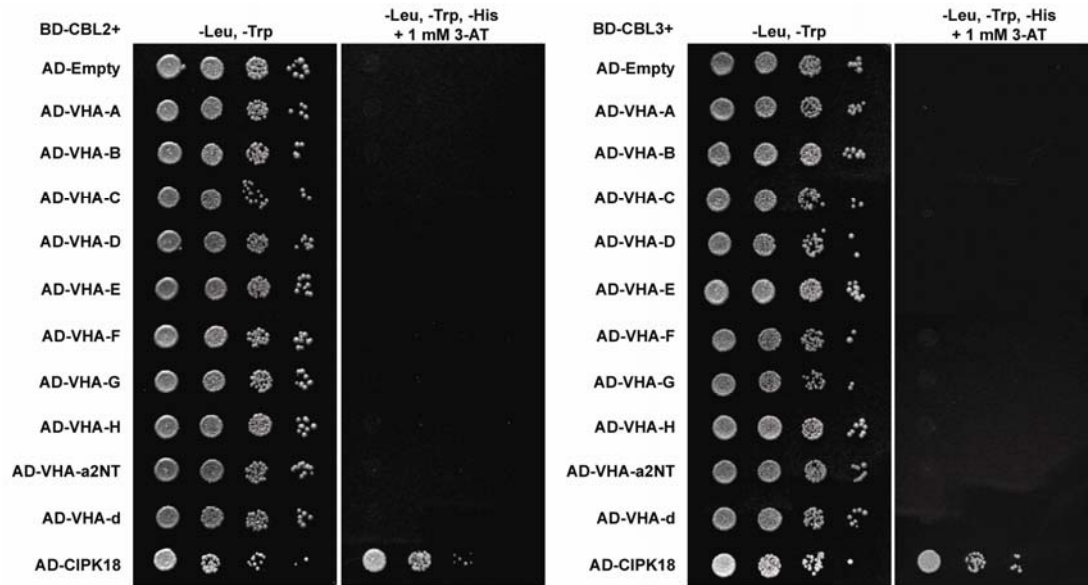

**Supplementary information, Figure S11** Yeast two-hybrid assays on CBL2/3 in combination with VHA subunits.

Yeast cells of the AH109 strain containing the indicated plasmid combinations were grown in liquid SD/-Leu/-Trp medium to an  $OD_{600}$  of 1.0. Four microliters of 10-fold dilution series were spotted on the control medium (SD/-Leu/-Trp) and selective medium (SD/-Leu/-Trp/-His/) supplemented with 1.5 mM 3-AT. While the results showed positive interaction between CBL2/3 with CIPK18, there is no obvious interaction between CBL2/3 and any VHA subunit tested in this study.
