# Supplementary material
Source: PubMed Central journal article supplement (PMC3515760)
Supplement: cr2012161x12.pdf [file cr2012161x12.pdf]

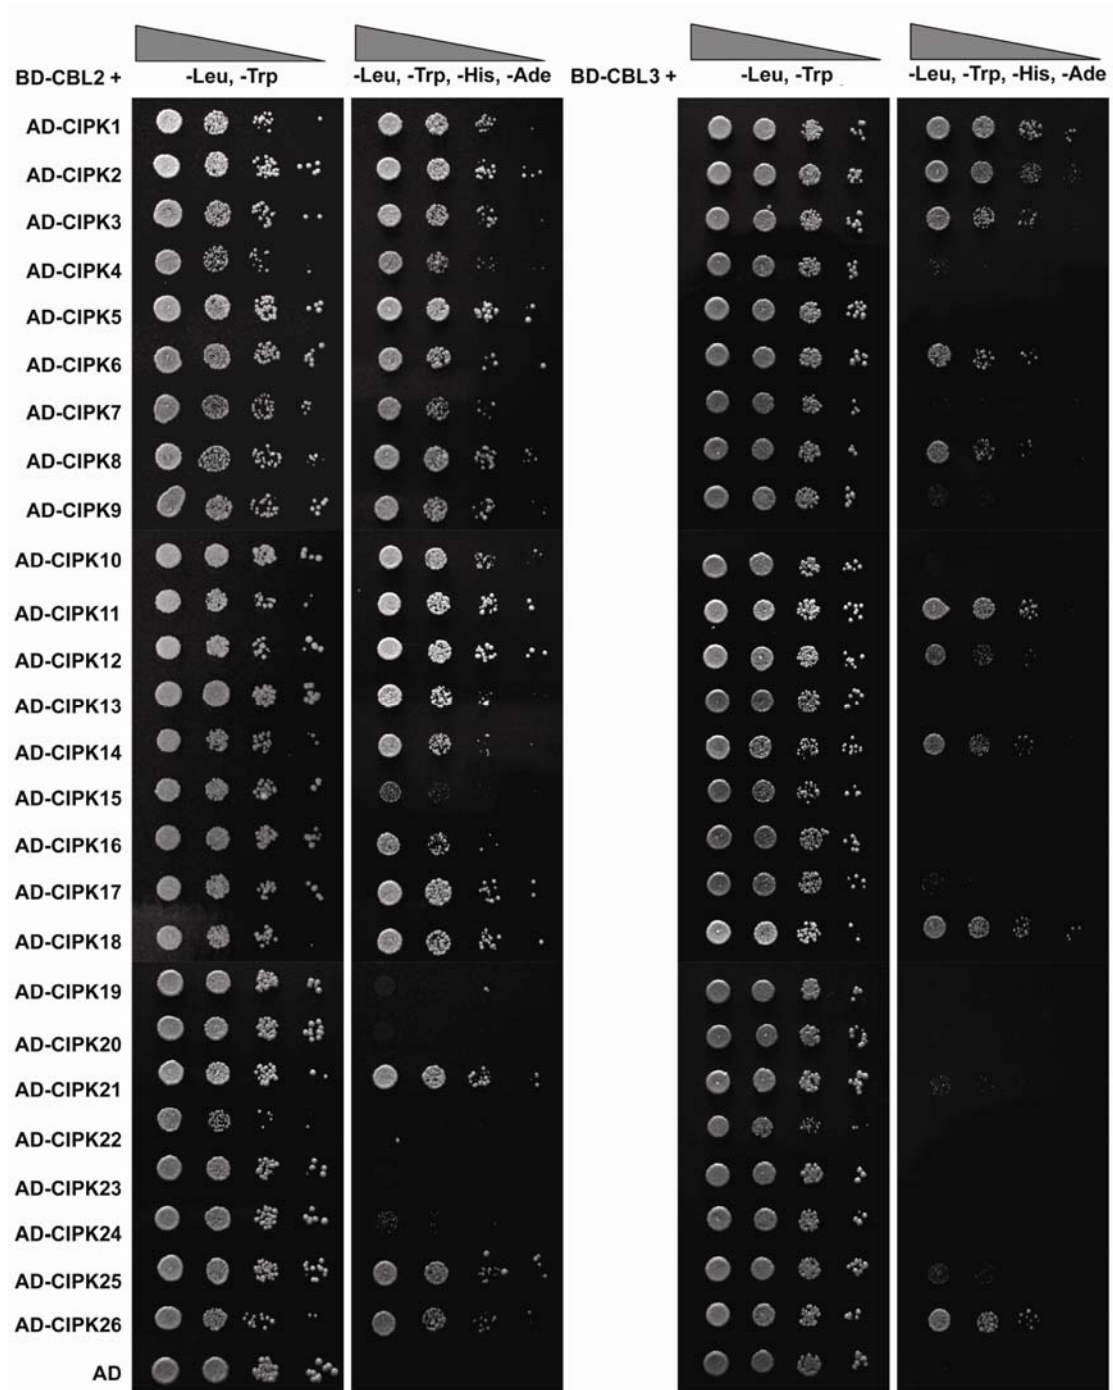

**Supplementary information, Figure S12** CBL2 and CBL3 interact with an array of CIPK proteins.

Yeast cells of the AH109 strain containing the indicated plasmid combinations were grown in liquid SD/-Leu/-Trp medium to an  $OD_{600}$  of 1.0. Four microliters of 10-fold dilution series were spotted on the control medium (SD/-Leu/-Trp) and selective medium (SD/-Leu/-Trp/-His/-Ade). Decreasing cell densities in the dilution series are illustrated by the narrowing triangles.
