# Supplementary material
Source: PubMed Central journal article supplement (PMC3515760)
Supplement: cr2012161x13.pdf [file cr2012161x13.pdf]

**Table S1** Primers used in this study

| Purpose                              | Name     | Primer sequence (5' to 3')   |
|--------------------------------------|----------|------------------------------|
| <i>CBL2</i> gene<br>cloning          | CBL2F    | CTAATGTCGCAGTGC GTTGACGGT    |
|                                      | CBL2R    | GCCGCTGCTTGCTTTTGCTTTTG      |
| <i>CBL3</i> gene<br>cloning          | CBL3F    | CATATGTCGCAGTGCATAGACGGT     |
|                                      | CBL3R    | TTCCCAAATTGTCTCCTCTGCTAA     |
| <i>CBL2</i> promoter<br>isolation    | PrCBL2F  | ACCCGGTACTGGATTTGTTTCG       |
|                                      | PrCBL2R  | GCAGCAAATCAA AACTCTCCATG     |
| <i>CBL3</i> promoter<br>isolation    | PrCBL3F  | TGTCGTTATCATTCTTTTTTTTTTC    |
|                                      | PrCBL3R  | ATCTTGTA AATCAA AACTCTCCATGC |
| <i>CBL2</i><br>RT-PCR                | CBL2RT-F | GCTCGTGCTCTCTCCGTCTTTC       |
|                                      | CBL2RT-R | GCCGCTGCTTGCTTTTGCTTTTG      |
| <i>CBL3</i><br>RT-PCR                | CBL3RT-F | CTGAGTCCGGCATGAACCTGTC       |
|                                      | CBL3RT-R | TTCCCAAATTGTCTCCTCTGCTAA     |
| <i>ACTIN2</i><br>RT-PCR              | ACT2RT-F | GGAAGGATCTGTACGGTAAC         |
|                                      | ACT2RT-R | GGACCTGCCTCATCATACT          |
| <i>CBL1</i><br>RT-PCR                | CBL1RT-F | CGACATGGACTGCACGGGTTAC       |
|                                      | CBL1RT-R | TCGTGGCAATCTACTCGGTCTTA      |
| <i>cbl2</i> mutant<br>identification | LP-CBL2  | CGTCTCCGTCTTCCTCGCTCAG       |
|                                      | RP-CBL2  | GCAGCAAATCAA AACTCTCCATG     |
| <i>cbl3</i> mutant<br>identification | LP-CBL3  | AAACGCCAACAAACAAAATAAT       |
|                                      | RP-CBL3  | TTCGGATTCAGAGATAACAACG       |
| T-DNA left<br>border primers         | LBa1     | TGGTTCACGTAGTGGGCCATCG       |
|                                      | LBSR     | CGATGTAGTGGTTGACGATGGT       |
