# Supplementary material
Source: PubMed Central journal article supplement (PMC3515760)
Supplement: cr2012161x14.pdf [file cr2012161x14.pdf]

**Data S1** The flanking sequence of the T-DNA insertion lines in this study.

The T-DNA flanking fragments were sequenced by using left border primers LB1 and LBSR, respectively. The underlined region matches genome sequence of each gene and the bolded region matches sequence of the T-DNA border of the construct.

SALK\_151426 (At5g55990, *CBL2*)

gctcagcttcaacaaccagagccgacttgagattgagaatcaacgtaatcggtaaatttcgtatacgcaaatccattctactc  
atthtgagttcacttacatataagattcttctatctctgttgaatctgcgattcacgaatccattaggacgattttgggatctag  
atcgggtttgtttctcagaacctgtaattgattgtgtaatccttgagttcattaatgtataaattcaaatcccaattgggtttgtt  
ctgatggattttattaattttgtgtgtccataaattgtgatgtttaagattaaaatttggttaatgagctttgattaagtctttagattct  
ccattaattttctatcttctcaatattgtatatattatgtggacataactgaatcatctgaatagtaaaatcatgataatgacttcag  
ttctaagcaatgtttgtgttcctatattgtgactccttaataacacattgcgagcgttttaattgtactgggggtggttttctt  
**ttcaccagtgagacgggcaacagctgattgcccttaccgcctggccctgagagagttgcagcaagcgggtccacgc**  
**tggtttgccccagcaggcgaaaatcctgtttgatgggtggtccgaaatcggcaaaatcccttataaatcaaaagaat**  
**agccccgagatagggttgagtgtgttccagtttggacaagagctcactattaagaacgtggactcca**

SAIL\_785\_C10 (At4g26570, *CBL3*)

ttgaaacgatgggtttaagacagcgcataaatggacacatgctccactagacgacgacgtgtgaaagtgaatgtaacaag  
gagttttattacaactgtatcaacatcgagtaaaaaataacaaaatttttttttaatttttaaaaaagtataaaaacgccacaa  
acaaaaataatttggtcttttcttagcatatttaaaattttgcaatatattcattctgcttatagaaaataattgtggtgtaaacaa  
**attgacgcttagacaacttaataacacattgaggacgttttaattgtactgaattaacgccgaattgaattcgattgg**  
**tgatcgagattggttatgaaattcagatgctagtgtaatgtattggtaatttgggaagatataataggaagcaaggc**  
**tattatccatttctgaaaaggcgaaatggcgtcaccgcgagcgtcacgcgattccgttcttctgtaaagcgttgtt**  
**tggtacacttttgactagcgaggcttggcgtgtcagcgtatctattcaaaagtcgtaatggctgcggatcaagaaaa**  
**agttggaatagaaacagaatacccgcgaaattcaggcccgggtgccatgtcctacacgccgaaataaacgaccaa**  
**attagtagaaaaataaaaactgactcggatacttacgtcacgtcttgcgcactgattgaaaaatctcaatataaac**  
**aaagacggccacaagaaaaacaaaacaccgatattcattaatcttatctagtttctcaaaaaattcatatcttc**  
**caca**
